# Supplementary material for: Building a network with assortative mixing starting from preference functions, with application to the spread of epidemics
Source: Frontiers journal article supplement (doi:10.3389/fphy.2024.1435767), 2024-08-05

# Building a network with assortative mixing starting from preference functions, with application to the spread of epidemics

## Supplementary figures

Razvan G. Romanescu

July 22, 2024

Figure S1. Theoretical density on a log scale (panel A) and empirical edge ratio (panel B) for a CM network with  $N=100,000$  vertices.

A

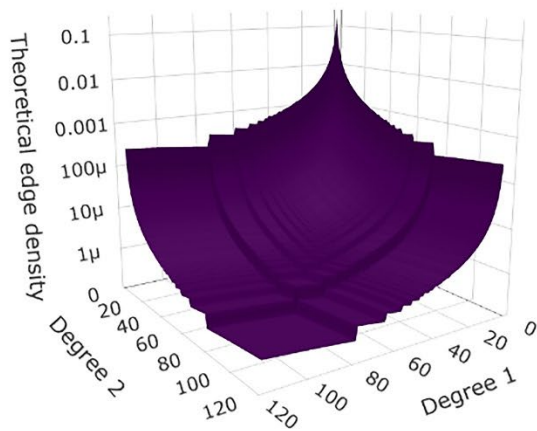

B

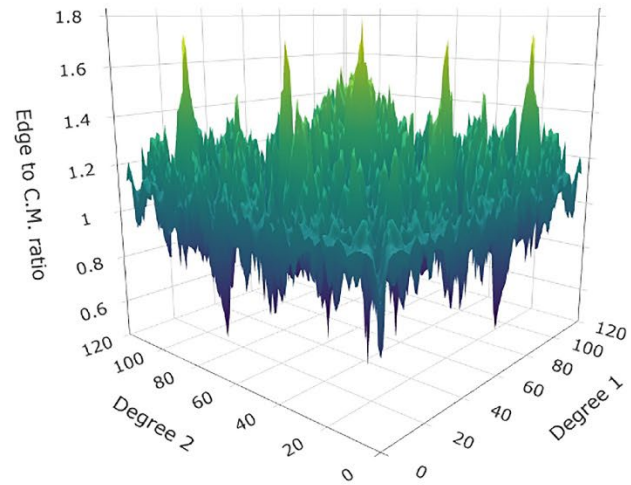

Figure S2. Epidemic curve over the CM network with  $\lambda = 2.5$ : incidence over time (panel A), and versus cumulative infections (panel B). Effective reproductive number (panel C). Transmissibility is  $\alpha = 0.25$ ; showing 100 realizations.

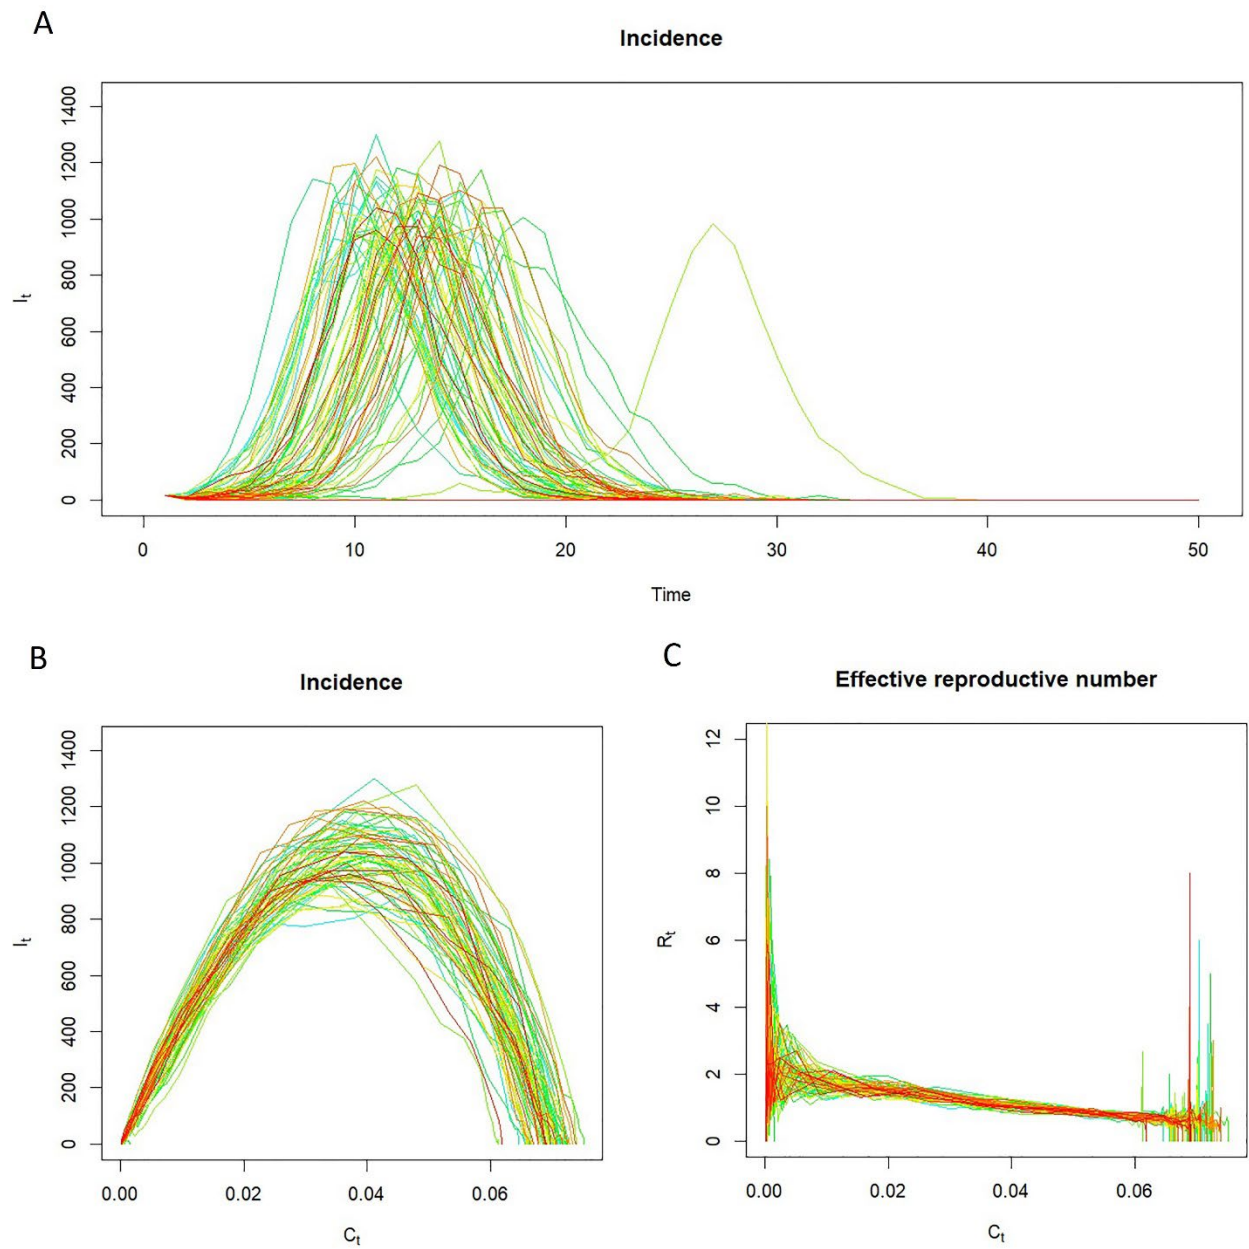

Supplement: Data_Sheet_1.pdf [file Data_Sheet_1.pdf]
